1 Urban Rural Disparities of Determinants of Antenatal Care in Senegal among  
2 Women of Reproductive Age: Evidence from 2023 Senegal Demographic Health  
3 Survey

4 Mushfiqur Rahman Khan Majlish<sup>1</sup>, Sultanul Arafean Tawhid<sup>1¶</sup>, Gulam Kibria<sup>1¶</sup>

5  
6

7 <sup>1</sup> Department of Statistics, University of Dhaka, Dhaka-1000, Bangladesh

8  
9 \*Corresponding author

10 Email: [mushfiqurrahman6947@gmail.com](mailto:mushfiqurrahman6947@gmail.com) (MRKM)

11  
12

13 ¶ These authors contributed equally to this work.

14

## 15 Abstract

16 **Background:** Antenatal care (ANC) is critical for ensuring positive pregnancy outcomes. Despite  
17 global efforts, ANC utilization remains suboptimal in many developing countries, including  
18 Senegal. This study aims to identify and distinguish between the key socio-demographic and  
19 economic factors influencing ANC utilization among urban and rural women in Senegal.

20 **Methods:** The analysis was conducted on 5107 women who had at least one birth in the last five  
21 years preceding the survey. Data were obtained from the 2023 Senegal Demographic and Health  
22 Survey (DHS). ANC utilization, defined as receiving four or more ANC visits during pregnancy,  
23 was the outcome variable. Independent variables included age, region, education, wealth index,  
24 total children ever born, pregnancy intention, employment status, media exposure, births in last

25 five years and women autonomy. Bivariate analyses and multiple logistic regression were  
26 conducted to identify the significant variables.

27 **Results:** The final sample included 4,785 women after excluding those with missing data. Higher  
28 education level (Adjusted Odds Ratio (AOR) = 3.649), rich wealth index (AOR=1.581), low  
29 (AOR=1.792) and high (AOR=1.692) media exposure were significantly associated with higher  
30 ANC in urban residences. On the contrary, in rural residences, primary (AOR=1.60), secondary  
31 (AOR=2.01) and higher (AOR=5.79) education level, intended pregnancy (AOR=1.33), low  
32 (AOR=1.48) and high (OR=1.35) media exposure and women autonomy (AOR=1.29) were  
33 significantly associated with higher ANC.

34 **Conclusions:** This study underscores the influence of different socio-economic and demographic  
35 factors on ANC utilization in urban and rural residences in Senegal. Policy interventions should  
36 prioritize enhancing education, economic opportunities, media awareness and women's autonomy,  
37 particularly in rural areas, to improve ANC coverage.

38 **Keywords:** Antenatal Care, Senegal, Multiple Logistic Regression, DHS

## 39 **Introduction**

40 Antenatal care (ANC) refers to the healthcare services provided to women during  
41 pregnancy by trained health professionals [1]. The key objectives of ANC include the prevention,  
42 detection, and management of pregnancy-related complications, ensuring safe delivery, and  
43 promoting the well-being of both the mother and the baby. ANC services generally include  
44 identifying potential complications during pregnancy, evaluating pregnancy risks, addressing any  
45 issues that may occur during the antenatal phase, administering treatments to enhance pregnancy

46 outcomes, offering guidance to expectant mothers, and helping them prepare both physically and  
47 mentally for childbirth and parenthood [2]. The World Health Organization (WHO) recommended  
48 at least four ANC visits for focused care, if the woman was eligible [3].

49 Maternal deaths due to pregnancy and childbirth complications have declined from  
50 451,000 in 2000 to 287,000 in 2020, despite significant population growth in regions with high  
51 maternal mortality rates. Yet, nearly 800 women continue to die daily from pregnancy-related  
52 complications, equating to one death every two minutes [4]. In West and Central Africa, maternal  
53 mortality decreased from 890 per 100,000 live births in 2000 to 724 in 2020. In sub-Saharan  
54 Africa, the rate dropped from 802 to 536, and in South Asia, it fell from 417 to 138 during the  
55 same period [5]. Reducing maternal mortality is a critical component of achieving the Sustainable  
56 Development Goals 3 (SDGs) which focuses on good health and well-being [6].

57 The factors influencing ANC utilization in African countries are diverse, ranging from  
58 socioeconomic status and education levels to geographic location and cultural practices. Barriers  
59 to accessing ANC include financial limitations, inadequate healthcare infrastructure, and a lack of  
60 awareness about the importance of regular ANC visits. For example, poor infrastructure and  
61 insufficient readiness of health facilities negatively impact ANC quality in countries like Ethiopia,  
62 Kenya, and South Africa [4]. Additionally, higher education levels and media exposure have been  
63 associated with increased ANC uptake, as seen in studies from East African countries [7].  
64 Moreover, it was also revealed that distance to health facility and maternal autonomy were  
65 significantly associated with ANC in Kenya [8]. These findings underscore the necessity for  
66 tailored interventions to enhance ANC utilization across Africa.

67 While ANC is recognized for its critical role in improving maternal and neonatal health  
68 outcomes, research specifically focusing on ANC in Senegal remains limited. Although several  
69 studies have investigated the effectiveness of ANC in African countries such as Ethiopia, Kenya,  
70 and Nigeria, no dedicated research paper has been published on Senegal's ANC practices. This  
71 research gap underscores the need for focused studies that address the distinct healthcare  
72 challenges faced by pregnant women in Senegal. For instance, studies had explored ANC quality  
73 in low- and middle-income countries but did not specifically address Senegal [4]. Similarly,  
74 broader reviews by organizations like the WHO examine ANC's impact on maternal mortality  
75 globally without providing Senegal-specific data [9]. This gap highlights the need for more  
76 research to guide healthcare policies and practices in Senegal.

## 77 **Materials and Methods**

### 78 **Data Source and Population**

79 This study made use of secondary data from the 2023 Senegal Demographic and Health  
80 Survey, which was carried out from February to August of that year and was nationally  
81 representative. There were two stages in the stratified sample process that the Demographic Health  
82 Survey Authority used. 14 regions—Dakar, Ziguinchor, Diourbel, Saint-Louis, Tambacounda,  
83 Kaolack, Thies, Louga, Fatick, Kolda, Matam, Kaffrine, Kedougou, and Sedhiou—were used to  
84 gather the data. A vast array of information was gathered from 8423 homes, 16583 female  
85 respondents who were between the ages of 15 and 49, and 6321 male respondents who were  
86 between the ages of 15 and 59. Among other important public health concerns, these included  
87 adult and pediatric morbidity and mortality, knowledge of and attitudes toward Human  
88 immunodeficiency viruses (HIV), fertility and fertility desires, marriage, and different elements of

89 reproductive health. The study was conducted on those women from urban and rural residence  
90 who had minimum one birth in last five years prior to the survey and the number of respondents  
91 was 5107.

## 92 **Study Variables**

93 The dependent variable was whether the respondent received ANC at the time of pregnancy  
94 which has 2 types of responses: either ANC received or did not receive. According to WHO, a  
95 respondent should receive minimum four ANC visits during her pregnancy [3]. Hence whether the  
96 respondent had received ANC or not was recoded as:

- 97 1. No (0) if the respondent had less than four antenatal care visits.
- 98 2. Yes (1) if the respondent had minimum of four antenatal care visits.

99 The explanatory variables that were used in this study are respondent's age group (15-19,  
100 20-24, 25-29, 30-34, 35-39, 40-44 and 45-40), region (Sedhiou, Dakar, Ziguinchor, Diourbel,  
101 Saint-Louis, Tambacounda, Kaolack, Thiès, Louga, Fatick, Kolda, Matam, Kaffrine, Kédougou),  
102 respondent's education level (no education, primary education, secondary, higher), wealth index  
103 (poor, middle, rich), total children born (less than 2, 2 to 4, more than 4), pregnancy intention  
104 (intended, unintended), employment status (not working, working), media exposure (no exposure,  
105 low exposure, high exposure), births in last five years (one birth, two births, more than two births)  
106 women autonomy (no, yes).

## 107 **Data Processing and Analysis**

108 Several variables had small number of missing values (<5%) and those observations were  
109 deleted for the analysis purpose. The final dataset had reduced observation of 4785. The study

110 focuses on identifying different determinants of urban and rural respondents that are responsible  
111 for receiving ANC visits. Therefore, two different datasets were extracted containing urban and  
112 rural respondent's information separately from the original dataset. The number of respondents on  
113 urban and rural were 1639 and 3146. Simple frequency distribution was conducted on the original  
114 dataset to understand the background characteristics. Utilizing a chi-square test and basic cross-  
115 tabulation, the bivariate relationship between the independent and dependent variables was  
116 examined in urban and rural datasets separately. Finally, multiple logistic regression was  
117 conducted to find the association between ANC utilization and independent variables. The STATA  
118 version 14.2 was utilized to conduct the entire analysis.

## 119 **Results**

### 120 **Background Characteristics**

121 Table 1 provides an in-depth analysis of several demographic and socio-economic factors  
122 affecting the population under investigation. The data reveals diverse educational backgrounds  
123 among respondents, with a significant 57.7% having no formal education, highlighting a major  
124 educational gap. About 18.7% have completed primary education, 21.1% have secondary  
125 education, and only 2.4% have higher education, indicating limited access to advanced education.  
126 Geographic distribution varies, with Sedhiou and Diourbel making up 7.9% and 7.5% of the  
127 sample, respectively, and Kaffrine having the largest share at 11.1%. Ziguinchor represents just  
128 3.5%, suggesting differences in population density and socio-economic conditions across regions.  
129 Most respondents (65.7%) live in rural areas, compared to 34.3% in urban areas, highlighting a  
130 predominant rural demographic. Regarding wealth, 57.8% of respondents are classified as poor,  
131 18.8% as middle, and 23.4% as rich, reflecting significant economic challenges. 49.5% of

132 respondents had 2-4 children, 29.0% of respondents had more than 4, and 21.5% of respondents  
 133 had fewer than 2 children. 53.6% of respondents had one birth in the last five years, 41.7% had  
 134 two births, and only 4.7% reported more than two births.

135 **Table 1: Background characteristics of the study participants.**

| <b>Variable</b>   | <b>Category</b> | <b>Frequency</b> | <b>Percent (%)</b> |
|-------------------|-----------------|------------------|--------------------|
| Educational Level | No education    | 2763             | 57.7               |
|                   | Primary         | 896              | 18.7               |
|                   | Secondary       | 1009             | 21.1               |
|                   | Higher          | 117              | 2.4                |
| Region            | Sedhiou         | 377              | 7.9                |
|                   | Dakar           | 276              | 5.8                |
|                   | Ziguinchor      | 166              | 3.5                |
|                   | Diourbel        | 361              | 7.5                |
|                   | Saint-Louis     | 305              | 6.4                |
|                   | Tambacounda     | 373              | 7.8                |
|                   | Kaolack         | 336              | 7.0                |
|                   | Thiès           | 365              | 7.6                |
|                   | Louga           | 312              | 6.5                |
|                   | Fatick          | 389              | 8.1                |
|                   | Kolda           | 371              | 7.8                |
|                   | Matam           | 294              | 6.1                |
|                   | Kaffrine        | 533              | 11.1               |

|                           |                    |      |      |
|---------------------------|--------------------|------|------|
|                           | Kedougou           | 327  | 6.8  |
| Residence                 | Urban              | 1639 | 34.3 |
|                           | Rural              | 3146 | 65.7 |
| Wealth index              | Poor               | 2767 | 57.8 |
|                           | Middle             | 900  | 18.8 |
|                           | Rich               | 1118 | 23.4 |
| Total Children Born       | Less than 2        | 1027 | 21.5 |
|                           | 2 to 4             | 2368 | 49.5 |
|                           | More than 4        | 1390 | 29.0 |
| Births in last five years | One birth          | 2564 | 53.6 |
|                           | Two births         | 1995 | 41.7 |
|                           | More than 2 births | 226  | 4.7  |
| Pregnancy Intention       | Unintended         | 726  | 15.2 |
|                           | Intended           | 4059 | 84.8 |
| ANC Received              | No                 | 1324 | 27.7 |
|                           | Yes                | 3461 | 72.3 |
| Employment Status         | Not working        | 3124 | 65.3 |
|                           | Working            | 1661 | 34.7 |
| Age Group                 | 15-19              | 342  | 7.1  |
|                           | 20-24              | 1186 | 24.8 |
|                           | 25-29              | 1162 | 24.3 |
|                           | 30-34              | 931  | 19.5 |
|                           | 35-39              | 779  | 16.3 |



|                |               |      |      |
|----------------|---------------|------|------|
|                | 40-44         | 313  | 6.5  |
|                | 45-49         | 72   | 1.5  |
| Media Exposure | No exposure   | 788  | 16.5 |
|                | Low exposure  | 2957 | 61.8 |
|                | High exposure | 1040 | 21.7 |
| Women Autonomy | No            | 2147 | 44.9 |
|                | Yes           | 2638 | 55.1 |

136 On pregnancy intentions, 84.9% of pregnancies were intended, and 15.2% were  
137 unintended, showing high rates of planned pregnancies. Antenatal care engagement is positive,  
138 with 72.3% attending at least one visit, while 27.7% did not. Employment data shows 65.3% are  
139 not working, and 34.7% are employed, indicating a high rate of unemployment. The age  
140 distribution is youthful, with the largest groups being 20-24 years (24.8%) and 25-29 years  
141 (24.3%), and only 1.5% aged 45-49. Media exposure varies, 61.8% have low exposure, 16.5% no  
142 exposure, and 21.7% high exposure, indicating differing access levels. Women's autonomy data  
143 reveals that 55.1% of respondents have decision making ability, while 44.9% do not.

## 144 **Determinants of ANC in Urban and Rural Residences**

145 Table 2 presents the prevalence of receiving antenatal care in relation to various  
146 background characteristics and highlights the significance of these associations in both urban and  
147 rural setting of Senegal. Region ( $p < 0.05$ ) and age category of respondents ( $p < 0.05$ ) significantly  
148 influences the likelihood of antenatal care and it is observed from the table that the percentage of  
149 receiving ANC is higher for most urban regions compared to that of rural regions. Moreover,  
150 respondent's education level is also statistically significant ( $p = 0.000$ ) with the association of

151 receiving ANC and respondents with higher education level had the highest percentage of  
 152 receiving ANC in both residences (Urban = 94.4%, Rural = 92.6%). Wealth index, total number  
 153 of children born and birth in last five years of respondent also significantly influence the likelihood  
 154 of receiving ANC ( $p < 0.05$ ) and rich people category had the highest percentage of receiving ANC  
 155 compared to the remaining groups (Urban = 83.9%, Rural = 76.8%). Moreover, respondents who  
 156 had less than two children and experienced only one birth in last five years were observed to have  
 157 highest ANC receiving percentage.

158 **Table 2: Bivariate Association of Covariates and ANC in Urban and Rural Residences**

| Variable | Category    | Urban (%)    |         | Rural (%)    |         |
|----------|-------------|--------------|---------|--------------|---------|
|          |             | ANC Received | p value | ANC Received | p value |
| Region   | Sedhiou     | 72.2         | <0.001  | 47.0         | <0.001  |
|          | Dakar       | 85.3         |         | 76.5         |         |
|          | Ziguinchor  | 87.5         |         | 64.3         |         |
|          | Diourbel    | 87.3         |         | 69.9         |         |
|          | Saint-Louis | 73.5         |         | 62.3         |         |
|          | Tambacounda | 80.3         |         | 76.5         |         |
|          | Kaolack     | 84.2         |         | 79.6         |         |
|          | Thiès       | 75.9         |         | 71.3         |         |
|          | Louga       | 86.3         |         | 80.6         |         |
|          | Fatick      | 74.7         |         | 75.8         |         |
|          | Kolda       | 81.4         |         | 67.2         |         |
|          | Matam       | 70.0         |         | 64.3         |         |
|          | Kaffrine    | 88.7         |         | 69.7         |         |

|                           |                    |      |        |      |        |
|---------------------------|--------------------|------|--------|------|--------|
|                           | Kedougou           | 66.3 |        | 57.1 |        |
| Age Category              | 15-19              | 82.1 | <0.001 | 70.8 | 0.001  |
|                           | 20-24              | 83.7 |        | 71.9 |        |
|                           | 25-29              | 82.1 |        | 69.6 |        |
|                           | 30-34              | 76.0 |        | 67.0 |        |
|                           | 35-39              | 80.4 |        | 61.7 |        |
|                           | 40-44              | 73.0 |        | 71.2 |        |
|                           | 45-49              | 58.3 |        | 52.1 |        |
| Education Category        | No education       | 75.2 | <0.001 | 64.6 | <0.001 |
|                           | Primary            | 80.3 |        | 73.5 |        |
|                           | Secondary          | 83.1 |        | 77.7 |        |
|                           | Higher             | 94.4 |        | 92.6 |        |
| Wealth Index              | Poor               | 71.4 | <0.001 | 66.4 | <0.001 |
|                           | Middle             | 77.7 |        | 75.3 |        |
|                           | Rich               | 83.9 |        | 76.8 |        |
| Total Born Children       | Less than 2        | 85.2 | <0.001 | 74.4 | <0.001 |
|                           | 2 to 4             | 81.2 |        | 70.1 |        |
|                           | More than 4        | 70.3 |        | 62.4 |        |
| Births in last five years | One birth          | 83.0 | 0.001  | 71.9 | <0.001 |
|                           | Two births         | 75.4 |        | 65.8 |        |
|                           | More than 2 births | 75.4 |        | 56.8 |        |
|                           |                    |      |        |      |        |

|                       |               |      |        |      |        |
|-----------------------|---------------|------|--------|------|--------|
| Pregnancy intention   | Unintended    | 74.5 | 0.018  | 64.0 | 0.029  |
|                       | Intended      | 80.9 |        | 69.1 |        |
| Media exposure        | No exposure   | 63.6 | <0.001 | 58.1 | <0.001 |
|                       | Low exposure  | 80.3 |        | 70.9 |        |
|                       | High exposure | 82.4 |        | 72.4 |        |
| Respondent Occupation | Not employed  | 79.6 | 0.734  | 69.4 | 0.052  |
|                       | Employed      | 80.3 |        | 65.9 |        |
| Women autonomy        | No            | 77.7 | 0.093  | 64.9 | <0.001 |
|                       | Yes           | 81.1 |        | 71.8 |        |

159 Intended pregnancies have higher ANC receiving percentage among urban (80.9%) and  
 160 rural (69.1%) residences and the relationship is significant in both cases. Media exposure is also  
 161 significantly associated with ANC and high exposure of media resulted in higher ANC receiving  
 162 percentage. Respondent occupation is not significantly associated with ANC in urban residences  
 163 but marginally significant in rural residences. Additionally, women autonomy is statistically  
 164 significant with ANC in rural residences and women with autonomy has higher ANC receiving  
 165 percentage. On the contrary, women autonomy is not a significant factor for ANC in urban  
 166 residences.

167 Table 3 illustrates the findings from the multiple logistic regression analysis, examining  
 168 the relationship between various categories and ANC attendance compared to their reference  
 169 groups in urban and rural residences in Senegal. Compared to Sedhiou, urban respondents residing  
 170 in Ziguinchor, Diourbel, Kaolack and Kaffrine and rural respondents residing in Diourbel,  
 171 Tambacounda, Kaolack, Thies, Louga, Fatick, Kolda, Matam and Kaffrine had significant higher

172 odds of receiving ANC. Compared to uneducated people, higher educated people are 3.649 times  
 173 more likely to receive ANC in urban residences and 5.79 times more likely to receive ANC in rural  
 174 residences and the relationship is significant. Primary and secondary educated people also had  
 175 higher odds although this relationship is insignificant in urban residences but significant in rural  
 176 residences.

177 **Table 3: Adjusted Odds Ratio (AOR) with p value obtained from Multiple Logistic**  
 178 **Regression**

|                 |                 | <b>Urban</b>         | <b>Rural</b>         |
|-----------------|-----------------|----------------------|----------------------|
| <b>Variable</b> | <b>Category</b> | <b>AOR (p value)</b> | <b>AOR (p value)</b> |
| Region          | Sedhiou (Ref)   |                      |                      |
|                 | Dakar           | 1.684 (0.108)        | 2.10 (0.226)         |
|                 | Ziguinchor      | 2.480 (<0.05)        | 1.41 (0.235)         |
|                 | Diourbel        | 2.390 (<0.05)        | 2.25 (<0.05)         |
|                 | Saint-Louis     | 0.951 (0.877)        | 1.49 (0.063)         |
|                 | Tambacounda     | 1.890 (1.86)         | 4.27 (<0.05)         |
|                 | Kaolack         | 2.071 (<0.05)        | 3.90 (<0.05)         |
|                 | Thiès           | 1.045 (0.891)        | 2.20 (<0.05)         |
|                 | Louga           | 1.926 (0.102)        | 4.10 (<0.05)         |
|                 | Fatick          | 0.947 (0.886)        | 3.37 (<0.05)         |
|                 | Kolda           | 1.487 (0.279)        | 2.11 (<0.05)         |
|                 | Matam           | 1.096 (0.804)        | 1.97 (<0.05)         |
| Kaffrine        | 3.210 (<0.05)   | 2.60 (<0.05)         |                      |

|                           |                    |               |               |
|---------------------------|--------------------|---------------|---------------|
|                           | Kedougou           | 0.861 (0.651) | 1.34 (0.120)  |
| Age Category              | 15-19 (Ref)        |               |               |
|                           | 20-24              | 1.004 (0.990) | 1.05 (0.798)  |
|                           | 25-29              | 0.847 (0.639) | 1.04 (0.826)  |
|                           | 30-34              | 0.552 (0.110) | 1.03 (0.900)  |
|                           | 35-39              | 0.810 (0.590) | 0.88 (0.559)  |
|                           | 40-44              | 0.539 (0.147) | 0.71 (0.199)  |
|                           | 45-49              | 0.275 (<0.05) | 0.67 (0.275)  |
| Education Category        | No education (Ref) |               |               |
|                           | Primary            | 1.164 (0.372) | 1.60 (<0.05)  |
|                           | Secondary          | 1.203 (0.282) | 2.01 (<0.05)  |
|                           | Higher             | 3.649 (<0.05) | 5.79 (<0.05)  |
| Wealth Index              | Poor (Ref)         |               |               |
|                           | Middle             | 1.145 (0.481) | 0.059 (0.059) |
|                           | Rich               | 1.581 (<0.05) | 0.285 (0.285) |
| Total Born Children       | Less than 2 (Ref)  |               |               |
|                           | 2 to 4             | 1.155 (0.508) | 1.05 (0.751)  |
|                           | More than 4        | 0.914 (0.750) | 0.93 (0.711)  |
| Births in last five years | One birth (Ref)    |               |               |
|                           | Two births         | 0.653 (<0.05) | 0.80 (<0.05)  |
|                           | More than 2 births | 0.837 (0.612) | 0.60 (<0.05)  |

|                       |                    |               |              |
|-----------------------|--------------------|---------------|--------------|
| Pregnancy intention   | Unintended (Ref)   |               |              |
|                       | Intended           | 1.287 (0.146) | 1.33 (<0.05) |
| Media exposure        | No exposure (Ref)  |               |              |
|                       | Low exposure       | 1.792 (<0.05) | 1.48 (<0.05) |
|                       | High exposure      | 1.692 (<0.05) | 1.35 (<0.05) |
| Respondent Occupation | Not employed (Ref) |               |              |
|                       | Employed           | 1.160 (0.289) | 0.88 (0.167) |
| Women autonomy        | No (Ref)           |               |              |
|                       | Yes                | 1.056 (0.704) | 1.29 (<0.05) |

179 According to wealth index, middle and rich urban people have higher odds of receiving  
180 ANC, 1.145 and 1.58 respectively and the relationship is significant for rich people only. On the  
181 other hand, rural middle and rich people are less likely to receive ANC compared to that of poor  
182 people and this relationship is insignificant. Parity had no significant relationship with ANC  
183 among urban and rural respondents. Pregnancy intention resulted in higher odds of receiving ANC,  
184 1.287 and 1.33 odds ratio respectively among urban and rural respondents compared to unintended  
185 pregnancy and this relationship is only significant among rural respondents. On the contrary, media  
186 exposure became significantly associated with ANC in both residences and exposure to media  
187 resulted in higher odds of receiving ANC compared to no exposure to media. Respondent  
188 occupation had no significant association with ANC in both residences. However, women  
189 autonomy was significantly associated with ANC among rural women but not in urban women  
190 and respondents having decision making ability in rural residences were 1.29 times more likely to  
191 receive ANC in Senegal.

## 192 **Discussion**

193           The objective of the study was to identify different factors associated with the utilization  
194 of a minimum of 4 antenatal care services in urban and rural residences in Senegal. This research  
195 was conducted based on the nationally representative 2023 Senegal Demographic and Health  
196 Survey data where a total of 4785 urban and rural respondents were included who had minimum  
197 one birth in last five years prior to the survey. Among the respondents, 72.3% have utilized a  
198 minimum of four ANC services in Senegal.

199           Our study findings reveal that, compared to Sedhiou, women from Ziguichor, Diourbel,  
200 Kaolack and Kaffrine in urban residences and women from Diourbel, Tambacounda, Kaolack,  
201 Thies, Louga, Fatick, Kolda, Matam and Kaffrine had higher likelihood of receiving in rural  
202 residence had higher likelihood of receiving ANC and this relationship is significant. Higher age  
203 also resulted in reduced ANC seeking behavior in both urban and rural residence in Senegal which  
204 is supported by a similar study in Ethiopia [10]. Moreover, women's education was positively  
205 associated with ANC utilization in Senegal. As the level of education increased from primary to  
206 higher, women were more likely to receive ANC in both urban and rural residences compared to  
207 uneducated women. This result aligned with a similar study conducted in Nigeria where education  
208 was one of the significant factors of receiving ANC [11]. However, our study revealed that all  
209 education level had significant association with ANC in rural residences whereas only higher  
210 education level was significantly associated with ANC in urban residences in Senegal.

211           According to wealth index, women from middle and rich households are likely to have  
212 more ANC in urban residences and this relationship is significant only rich household but the  
213 likelihood decreases in rural residences and none of the wealth index levels are significant with



214 ANC for rural residences compared to poor households in Senegal. This outcome is in line with a  
215 similar study conducted in Ghana where wealth indexes in rural residences were insignificant  
216 although it was significant for urban residences [12]. Moreover, respondents who had experienced  
217 more than one births in last five years in both urban and rural residences were less likely to receive  
218 ANC compared to those who experienced only one child birth and this relationship is significant  
219 in both urban and rural residences in Senegal. This outcome aligned with a similar study conducted  
220 in Ghana where it was revealed that more than four births had a decreasing likelihood of ANC  
221 [13].

222 Intended pregnancies had a higher likelihood of receiving ANC compared to unintended  
223 pregnancies in both residences though this relationship is only significant among rural women. A  
224 systematic review study identified that unintended pregnancy resulted in delayed antenatal care  
225 compared to intended pregnancy and our results also agrees with it [14]. Media exposure is an  
226 important factor for ANC and it is revealed that respondents who were exposed to some media had  
227 a higher likelihood of receiving ANC in both residences. Several similar studies have also  
228 identified media exposure as an important factor for receiving ANC [15-16]. However, the  
229 likelihood is slightly higher in urban residences and this relationship is significant among both  
230 urban and rural women in Senegal. Respondent who are employed displayed a higher likelihood  
231 of receiving ANC among urban women but lower likelihood among rural women. However, this  
232 relationship is insignificant in both residences in Senegal. Our study did not agree to a similar  
233 study conducted in East African countries where respondent's occupation had a significant impact  
234 on receiving ANC [17]. Women who participated in household decision making resulted in  
235 increased likelihood of ANC in both urban and rural residences. This outcome aligned with the

236 results in India where women autonomy resulted in increased likelihood of receiving ANC [18].  
237 However, this relationship is not significant in urban residences but significant in rural residences.

## 238 **Limitations of the Study**

239 The study was conducted on Senegal DHS which relies on self-reported information.  
240 Hence the data can be subject to recall bias or misreporting. Additionally, the study utilized data  
241 obtained from a cross sectional survey, which can only demonstrate the presence of an association  
242 between variables, rather than a cause-and-effect relationship.

## 243 **Conclusion**

244 The study revealed a noticeable difference among the factors responsible for receiving  
245 ANC in urban and rural residences of Senegal. Higher level of education was a significant factor  
246 of ANC in both residences although, only in rural residences, primary and secondary education  
247 also had a significant influence. This finding underscores the importance of enhancing educational  
248 opportunities in rural settings as a critical policy lever for improving maternal health outcomes.  
249 On the contrary, wealth index was significantly associated with ANC in urban respondents but it  
250 had no impact on rural area women. Women exposed to media are more likely to receive ANC in  
251 both areas and this relationship is significant and so raising awareness via various media play a  
252 crucial role of receiving ANC in both urban and rural residences. Women autonomy only has  
253 significant influence on ANC in rural areas but not in urban residences which highlights the role  
254 of woman empowerment in rural regions for receiving ANC. The different factors identified as  
255 determinants of attending four or more ANC visits among urban and rural respondents in this study  
256 offer valuable insights to adjust its policy initiatives aimed at boosting the coverage of four or  
257 more ANC visits among women in Senegal.

## 258 **Acknowledgements**

259 The authors thank Prof. Dr. Wasimul Bari for his useful comments and suggestions.

## 260 **Authors' contributions**

261 MRKM, SAT and GK generated the study idea, formed the research team, and designed  
262 the study and conducted the initial literature review. SAT wrote the introduction, MRKM, SAT  
263 and GK wrote the methodology and MRKM analyzed the data. MRKM wrote the initial draft of  
264 the manuscript. All authors contributed to the intellectual content of the manuscript and read and  
265 approved the final version of the manuscript.

## 266 **Funding**

267 The author(s) received no specific funding for this work.

## 268 **Ethics approval and consent to participate**

269 As the data was obtained from an open source of Official Website of DHS  
270 (<https://dhsprogram.com/>), the ethical approval and consent to participate are not applicable for  
271 this study.

## 272 **Consent for publication**

273 As the study does not contain any individual and institutional data in any form (including  
274 any individual details, images, or videos), the consent for publication is not applicable for this  
275 study.

## 276 **Availability of data and materials**

277 The dataset, analyzed in this study, was obtained from the open source of Official Website  
278 of DHS program (Weblink: <https://www.dhsprogram.com/Data/>). The Senegal Demographic and  
279 Health Survey 2023 dataset was availed from website for this study (Link:  
280 <https://dhsprogram.com/methodology/survey/survey-display-611.cfm>)

281

## 282 **References**

- 283 1. Mekonnen T, Dune T, Perz J, Ogbo FA. Trends and determinants of antenatal care service  
284 use in Ethiopia between 2000 and 2016. *Int J Environ Res Public Health*. 2019;16(5):1-15.  
285 <https://doi.org/10.3390/ijerph16050838>
- 286 2. Aziz Ali S, Ahmed Dero A, Aziz Ali S, Bano Ali G. Factors affecting the utilization of  
287 antenatal care among pregnant women: A literature review. *J Pregnancy Neonatal Med*.  
288 2018;2(2):1-5.
- 289 3. World Health Organization. Antenatal care (at least four visits). [Internet]. [cited 2024 Sep  
290 21]. Available from: [https://www.who.int/data/gho/indicator-metadata-registry/imr-](https://www.who.int/data/gho/indicator-metadata-registry/imr-details/80)  
291 [details/80](https://www.who.int/data/gho/indicator-metadata-registry/imr-details/80)
- 292 4. Arsenault C, Mfeka-Nkabinde NG, Chaudhry M, Jarhyan P, Taddele T, Mugenya I, et al.  
293 Antenatal care quality and detection of risk among pregnant women: An observational study  
294 in Ethiopia, India, Kenya, and South Africa. *PLoS Med*. 2024;21(8):1-14.  
295 <https://doi.org/10.1371/journal.pmed.1004258>

- 296 5. UNICEF. Maternal mortality rates and statistics. [Internet]. [cited 2024 Sep 21]. Available  
297 from: <https://data.unicef.org/topic/maternal-health/maternal-mortality/>
- 298 6. United Nations. The 17 goals | Sustainable Development. [Internet]. [cited 2024 Sep 21].  
299 Available from: <https://sdgs.un.org/goals>
- 300 7. Raru TB, Ayana GM, Zakaria HF, Merga BT. Association of higher educational attainment  
301 on antenatal care utilization among pregnant women in East Africa using demographic and  
302 health surveys from 2010 to 2018: A multilevel analysis. *Int J Womens Health*. 2022;14:67-  
303 77. <https://doi.org/10.2147/IJWH.S350510>
- 304 8. Asweto CO, Aluoch JR, Obonyo CO, Ouma JO. Maternal autonomy, distance to health care  
305 facility and ANC attendance: Findings from Madiany Division of Siaya County, Kenya.  
306 *Am J Public Health Res*. 2014;2(4):153-158. <https://doi.org/10.12691/ajphr-2-4-5>
- 307 9. Ermias Geltore T, Laloto Anore D. The impact of antenatal care in maternal and perinatal  
308 health. In: *Empowering Midwives and Obstetric Nurses*. IntechOpen; 2021.  
309 <https://doi.org/10.5772/intechopen.98668>
- 310 10. Wilunda C, Quaglio G, Putoto G, Takahashi R, Calia F, Abebe D, et al. Determinants of  
311 utilization of antenatal care and skilled birth attendant at delivery in South West Shoa Zone,  
312 Ethiopia: A cross-sectional study. *Reprod Health*. 2015;12(1):1-10.  
313 <https://doi.org/10.1186/s12978-015-0067-y>
- 314 11. Nghargbu R, Olaniyan O. Determinants of antenatal care utilization in Nigeria. Working  
315 Paper Series No 321. Abidjan, Côte d'Ivoire: African Development Bank; 2019

- 316 12. Afful-Mensah G, Nketiah-Amponsah E, Boakye-Yiadom L. Maternal healthcare in Ghana:  
317 The case of antenatal and delivery services. *Afr Soc Sci Rev.* 2014;6(1):1-20. Available  
318 from: <https://digitalscholarship.tsu.edu/assr/vol6/iss1/4/>
- 319 13. Dickson KS, Darteh EKM, Kumi-Kyereme A, Ahinkorah BO. Determinants of choice of  
320 skilled antenatal care service providers in Ghana: Analysis of demographic and health  
321 survey. *Matern Health Neonatol Perinatol.* 2018;4(1):1-9. [https://doi.org/10.1186-s40748-](https://doi.org/10.1186/s40748-018-0082-4)  
322 [018-0082-4](https://doi.org/10.1186/s40748-018-0082-4)
- 323 14. Dibaba Y, Fantahun M, Hindin MJ. The effects of pregnancy intention on the use of  
324 antenatal care services: Systematic review and meta-analysis. *Reprod Health.* 2013;10(1):1-  
325 11. <https://doi.org/10.1186/1742-4755-10-50>.
- 326 15. Sserwanja Q, Mutisya LM, Musaba MW. Exposure to different types of mass media and  
327 timing of antenatal care initiation: Insights from the 2016 Uganda Demographic and Health  
328 Survey. *BMC Womens Health.* 2022;22(1):1-10. [https://doi.org/10.1186/s12905-022-](https://doi.org/10.1186/s12905-022-01594-4)  
329 [01594-4](https://doi.org/10.1186/s12905-022-01594-4)
- 330 16. Shibre G, Zegeye B, Idriss-Wheeler D, Yaya S. Factors affecting the utilization of antenatal  
331 care services among women in Guinea: A population-based study. *Fam Pract.*  
332 2021;38(2):63-69. <https://doi.org/10.1093/fampra/cmaa053>
- 333 17. Tessema ZT, Minyihun A. Utilization and determinants of antenatal care visits in East  
334 African countries: A multicountry analysis of demographic and health surveys. *Adv Public*  
335 *Health.* 2021;2021:1-9. <https://doi.org/10.1155/2021/6623009>
- 336 18. Majumder K, Sarkar M, Mallick R, Mondal S, Chouhan P. Does women's decision-making  
337 autonomy matter in utilization of antenatal care services in India? An analysis from

338 nationally representative survey. PLoS One. 2024;19(8):1-13.

339 <https://doi.org/10.1371/journal.pone.0308576>

340
